# Supplementary material
Source: MDPI journal article supplement (https://www.mdpi.com/2073-4344/11/11/1281)

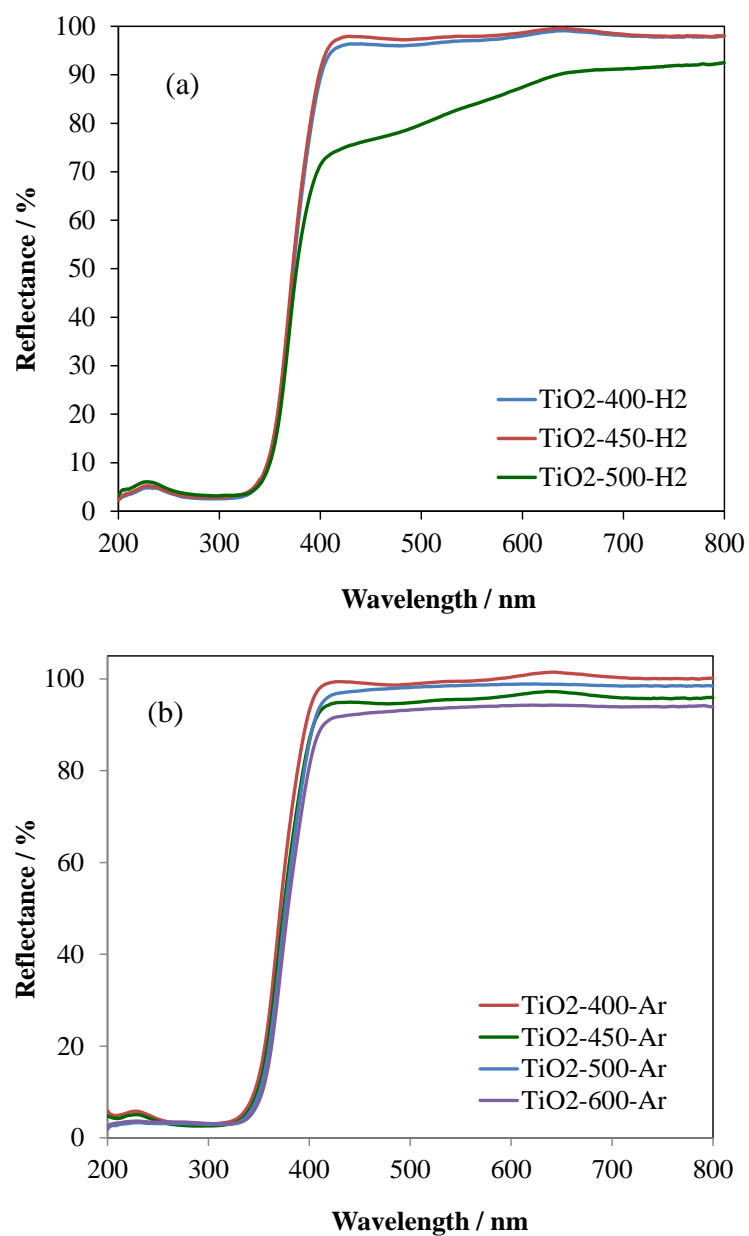

**Figure S1:** UV-Vis/DR spectra of TiO<sub>2</sub> samples heat-treated under (a) hydrogen, and (b) argon

Supplement: s1 [file s1]
